# Supplementary material
Source: publisher site journal article supplement (https://www.dovepress.com/get_supplementary_file.php?f=431498.docx)
Supplement: Supplementary file 1 [file get_supplementary_file.php]

**Anticancer drugs compared to no anticancer drugs in patients with advanced hepatobiliary cancer: A mapping review and evidence gap map**

**Authors:**

Requeijo C (1,2)a, Bracchiglione J (2,3,4)a, Meza N (3), Acosta-Dighero R (3), Salazar J (2), Santero M (2), Meade A (2), Quintana MJ (2,4,5), Rodríguez-Grijalva G (2), Selva A (4,6), Solà I (2,4), Urrútia G (2,4), Bonfill Cosp X (2,4,5), Appropriateness of Systemic Oncological Treatments for Advanced Cancer (ASTAC) Research Group

1. Programa de Doctorat en Metodologia de la Recerca Biomèdica i Salut Pública, Universitat Autònoma de Barcelona, Barcelona, Spain
2. Iberoamerican Cochrane Centre, Biomedical Research Institute Sant Pau (IIB Sant Pau), Barcelona, Spain
3. Interdisciplinary Centre for Health Studies (CIESAL), Universidad de Valparaíso, Viña del Mar, Chile
4. CIBER Epidemiología y Salud Pública (CIBERESP), Barcelona, Spain
5. Universitat Autònoma de Barcelona, Barcelona, Spain
6. Clinical Epidemiology and Cancer Screening. Parc Taulí Hospital Universitari. Institut d'Investigació i Innovació Parc Taulí (I3PT-CERCA). Universitat Autònoma de Barcelona. Sabadell, Spain.

a Carolina Requeijo and Javier Bracchiglione contributed equally to this work.

Corresponding author:

Carolina Requeijo

([crequeijo@santpau.cat](mailto:crequeijo@santpau.cat))

**Appendix 1: Outcomes**

| **Outcome** | **Definition** |
| --- | --- |
| **Overall survival (OS)** | As a dichotomous outcome (at 3, 6, 9, 12, 24 months) and as a continuous or time-to-event outcome. |
| **Progression-free survival (PFS)** | As a dichotomous outcome (at 3, 6, 9, 12, 24 months) and as a continuous or time-to-event outcome. |
| **Functional status** | Measured with Karnofsky or ECOG scale. |
| **Toxicity** | Measured as moderate or severe adverse events, according to standardised classification (22). |
| **Symptoms related to the disease** | Measured with validated scales that assess one or more symptoms. |
| **Quality of life (QoL)** | Measured with validated scales. |
| **Admissions to hospital or long-term centre, or emergency consultations** | Measured as the total number of admissions and days of admission during the follow-up period. |
| **Quality of death (end of life care)** | Admission to hospital at the end-of-life: Admission to the hospital in the last 30 days of life. |
| Palliative care provided during the last year: As a dichotomous outcome. |
| Place of death: Home, institutionalised (health community centre or residence), hospitalised (intensive care or other). |

**Appendix 2: Search strategy for Pubmed**

| #1 | ("Gastrointestinal Neoplasms"[Mesh:NoExp] OR "Esophageal Neoplasms"[Mesh] OR "Stomach Neoplasms"[Mesh] OR "Liver Neoplasms"[Mesh] OR "Biliary Tract Neoplasms"[Mesh] OR "Pancreatic Neoplasms"[Mesh]) |
| --- | --- |
| #2 | ((esophag*[Title] OR oesophag*[Title] OR stomach*[Title] OR gastric*[Title] OR gastroesophag*[Title] OR liver*[Title] OR hepatic*[Title] OR hepatocel*[Title] OR biliary tract*[Title] OR bile duct*[Title] OR gallbladder*[Title] OR gall bladder*[Title] OR pancreas*[Title] OR pancreatic*[Title] OR gastrointestinal*[Title]) AND (cancer*[Title] OR carcinom*[Title] OR neoplasm*[Title] OR tumor*[Title] OR tumour*[Title] OR malignan*[Title] OR adenocar*[Title] OR oncolog*[Title])) |
| #3 | (#1 OR #2) |
| #4 | Search: ("Palliative Care"[Mesh] OR "Terminal Care"[Mesh] OR "Neoplasm Metastasis"[Mesh]) |
| #5 | (palliative*[Title/Abstract] OR end of life*[Title/Abstract] OR end of live*[Title/Abstract] OR terminal*[Title/Abstract] OR metasta*[Title/Abstract] OR BSC[Title/Abstract] OR supportive care*[Title/Abstract] OR advanced*[Title/Abstract] OR unresect*[Title/Abstract] OR irresect*[Title/Abstract] OR nonresect*[Title/Abstract] OR non resect*[Title/Abstract] OR inopera*[Title/Abstract] OR unopera*[Title/Abstract] OR nonopera*[Title/Abstract] OR non opera*[Title/Abstract] OR non-opera*[Title/Abstract] OR stage IV[Title/Abstract]) |
| #6 | (#4 OR #5) |
| #7 | (#3 AND #6) |
| #8 | ("Antineoplastic Protocols"[Mesh] OR "Chemoradiotherapy"[Mesh] OR "Induction Chemotherapy"[Mesh] OR "Maintenance Chemotherapy"[Mesh] OR "Consolidation Chemotherapy"[Mesh]) |
| #9 | (antineoplastic*[Title] OR antineoplasic*[Title] OR chemotherap*[Title] OR chemoradiotherap*[Title] OR radiochemotherap*[Title] OR carboplatin*[Title] OR cisplatin*[Title] OR oxaliplatin*[Title] OR platin*[Title] OR fluorouracil*[Title] OR 5-FU[Title] OR capecitabine*[Title] OR docetaxel*[Title] OR taxotere[Title] OR epirucibin*[Title] OR irinotecan*[Title] OR onivyde[Title] OR paclitaxel*[Title] OR abraxane[Title] OR trifluridine*[Title] OR tipiracil*[Title] OR lonsurf[Title] OR gemcitabine*[Title] OR gemzar[Title] OR mitomycin*[Title]) |
| #10 | (#8 OR #9) |
| #11 | ("Molecular Targeted Therapy"[Mesh] OR "Antibodies, Monoclonal"[Mesh] OR "Cancer Vaccines"[Mesh]) |
| #12 | (Target*[Title] OR antibod*[Title] OR immunotherap*[Title] OR vaccine[Title] OR vaccines[Title] OR vaccination[Title] OR tyrosine kinase inhibit*[Title] OR trastuzumab[Title] OR herceptin[Title] OR bevacizumab[Title] OR rilotumumab[Title] OR onartuzumab[Title] OR ramucirumab[Title] OR cyramza[Title] OR cetuximab[Title] OR panitumumab[Title] OR nimotuzumab[Title] OR claudiximab[Title] OR apatinib[Title] OR lapatinib[Title] OR regorafenib[Title] OR stivarga[Title] OR everolimus[Title] OR nivolumab[Title] OR opdivo[Title] OR pembrolizumab[Title] OR keytruda[Title] OR avelumab[Title] OR durvalumab[Title] OR ipilimumab[Title] OR checkpoint inhibit*[Title] OR cabozantinib[Title] OR cabometyx[Title] OR lenvatinib[Title] OR lenvima[Title] OR sorafenib[Title] OR nexavar[Title] OR sunitinib[Title] OR sutent[Title] OR erlotinib[Title] OR tarceva[Title] OR doxorubicin[Title]) |
| #13 | (#11 OR #12) |
| #14 | (#10 OR #13) |
| #15 | (#7 AND #14) |
| #16 | (animals [mh] NOT humans [mh]) |
| #17 | (#15 NOT #16) |

**Appendix 3. List of the included studies and their publication threads, with references**

| Study ID | Main reference | Other references in the publication thread |
| --- | --- | --- |
| ABC-06 | [[1]](https://paperpile.com/c/bqcjWd/cAKRN) |  |
| Abdel Wahab 2010 | [[2]](https://paperpile.com/c/bqcjWd/n7FjL) |  |
| Abdel-Rahman 2018 | [[3]](https://paperpile.com/c/bqcjWd/dky2c) |  |
| Abdelmaksoud 2021 | [[4]](https://paperpile.com/c/bqcjWd/7qQlO) |  |
| Abou-Alfa 2016 | [[5]](https://paperpile.com/c/bqcjWd/Qvrgf) | [[6]](https://paperpile.com/c/bqcjWd/VzQDp) |
| Abou-Alfa 2018 | [[7]](https://paperpile.com/c/bqcjWd/J3vPw) |  |
| AHELP | [[8]](https://paperpile.com/c/bqcjWd/RZbOi) | [[9]](https://paperpile.com/c/bqcjWd/pgyaj) |
| Asia-Pacific | [[10]](https://paperpile.com/c/bqcjWd/Lhbwn) | [[11–16]](https://paperpile.com/c/bqcjWd/EaJzp+Pq8et+OD1Ml+FHs3X+i0yMe+hkLt3) |
| Azarfane 2021 | [[17]](https://paperpile.com/c/bqcjWd/5wA75) |  |
| BOOST | [[18]](https://paperpile.com/c/bqcjWd/6WmtU) |  |
| BRISK-PS | [[19]](https://paperpile.com/c/bqcjWd/DVCFd) |  |
| Brunner 2004 | [[20]](https://paperpile.com/c/bqcjWd/3wufK) |  |
| CELESTIAL | [[21]](https://paperpile.com/c/bqcjWd/p2eVa) | [[22–37]](https://paperpile.com/c/bqcjWd/HOEuE+lmN1S+Cfk86+twXbZ+f5SIp+two3w+XgdHT+quK0X+fI5Yc+YE09g+qNOXh+LGfqm+nNBla+0SrRU+mUsJv+fUbwM) |
| Chen 2021 | [[38]](https://paperpile.com/c/bqcjWd/tm87H) |  |
| Chen 2022 | [[39]](https://paperpile.com/c/bqcjWd/LztV6) |  |
| ClarIDHy | [[40]](https://paperpile.com/c/bqcjWd/uS8uC) | [[41]](https://paperpile.com/c/bqcjWd/edU6c) |
| Dierks 2018 | [[42]](https://paperpile.com/c/bqcjWd/1HryB) |  |
| Ding 2020 | [[43]](https://paperpile.com/c/bqcjWd/4naXh) |  |
| Dover 2014 | [[44]](https://paperpile.com/c/bqcjWd/OJYvb) |  |
| Du 2019 | [[45]](https://paperpile.com/c/bqcjWd/IM7T8) |  |
| Duan 2017 | [[46]](https://paperpile.com/c/bqcjWd/OEDP9) |  |
| El Baghdady 2020 | [[47]](https://paperpile.com/c/bqcjWd/0JOIP) | [[48]](https://paperpile.com/c/bqcjWd/SVj42) |
| EUCTR2007-007629-32-IT 2008 | [[49]](https://paperpile.com/c/bqcjWd/eMmKB) |  |
| EVOLVE-1 | [[50]](https://paperpile.com/c/bqcjWd/7v5DW) |  |
| Faruque 2014 | [[51]](https://paperpile.com/c/bqcjWd/6Z4Tt) |  |
| Finn 2018 | [[52]](https://paperpile.com/c/bqcjWd/gTxeQ) |  |
| Ghiassi-Nejad 2016 | [[53]](https://paperpile.com/c/bqcjWd/r2PpJ) |  |
| Glimelius 1996 | [[54]](https://paperpile.com/c/bqcjWd/ZLhWo) |  |
| Griffiths 2022 | [[55]](https://paperpile.com/c/bqcjWd/DoOw5) |  |
| Guo 2019 | [[56]](https://paperpile.com/c/bqcjWd/xhPEe) |  |
| Haber 2021 | [[57]](https://paperpile.com/c/bqcjWd/QvPUX) |  |
| Hiramine 2013 | [[58]](https://paperpile.com/c/bqcjWd/BodCW) |  |
| Hiraoka 2021 | [[59]](https://paperpile.com/c/bqcjWd/jazaE) |  |
| Hsiao 2019 | [[60]](https://paperpile.com/c/bqcjWd/jx4C8) |  |
| Hsu 2012 | [[61]](https://paperpile.com/c/bqcjWd/XgtXI) | [[62]](https://paperpile.com/c/bqcjWd/LMb4O) |
| Huang 2019 | [[63]](https://paperpile.com/c/bqcjWd/Jts8w) |  |
| Ishii 2004 | [[64]](https://paperpile.com/c/bqcjWd/3I0ps) |  |
| Ishikawa 2001 | [[65]](https://paperpile.com/c/bqcjWd/E46Xv) |  |
| Jácome 2021 | [[66]](https://paperpile.com/c/bqcjWd/jyMc4) |  |
| Jang 2007 | [[67]](https://paperpile.com/c/bqcjWd/tM9jG) |  |
| JET-HCC | [[68]](https://paperpile.com/c/bqcjWd/fbsuo) |  |
| Ji 2014 | [[69]](https://paperpile.com/c/bqcjWd/v7kgE) |  |
| Ji 2018 | [[70]](https://paperpile.com/c/bqcjWd/tJ8kJ) |  |
| Jiang 2021 | [[71]](https://paperpile.com/c/bqcjWd/TGRhK) |  |
| Kane 2009 | [[72]](https://paperpile.com/c/bqcjWd/6Z5fY) |  |
| Kang 2015 | [[73]](https://paperpile.com/c/bqcjWd/fUext) |  |
| Kang 2018 | [[74]](https://paperpile.com/c/bqcjWd/7abf1) |  |
| KEYNOTE-240 | [[75]](https://paperpile.com/c/bqcjWd/OarOJ) | [[76–78]](https://paperpile.com/c/bqcjWd/WX8v+kntF+VA4X) |
| Kataria 2019 | [[79]](https://paperpile.com/c/bqcjWd/BxDy) | [[80]](https://paperpile.com/c/bqcjWd/F54s) |
| Koch 2020 | [[81]](https://paperpile.com/c/bqcjWd/rcYKc) |  |
| Lai 1988 | [[82]](https://paperpile.com/c/bqcjWd/GqVIN) |  |
| Lesmana 2012 | [[83]](https://paperpile.com/c/bqcjWd/FkAT8) |  |
| Ling-lin 2011 | [[84]](https://paperpile.com/c/bqcjWd/YtJT7) |  |
| Liu 2021 | [[85]](https://paperpile.com/c/bqcjWd/B3O0E) |  |
| Mao 2020 | [[86]](https://paperpile.com/c/bqcjWd/sJVXZ) |  |
| METIV-HCC | [[87]](https://paperpile.com/c/bqcjWd/0qmAt) |  |
| Meyers 2021 | [[88]](https://paperpile.com/c/bqcjWd/LUdfq) |  |
| Min Jae 2018 | [[89]](https://paperpile.com/c/bqcjWd/D5nkm) |  |
| Moik 2019 | [[90]](https://paperpile.com/c/bqcjWd/MrtS9) |  |
| NCT01932385 | [[91]](https://paperpile.com/c/bqcjWd/xSO4c) |  |
| Niu 2016 | [[92]](https://paperpile.com/c/bqcjWd/PicOx) |  |
| Park 2014 | [[93]](https://paperpile.com/c/bqcjWd/f84Ba) |  |
| Park 2021 | [[94]](https://paperpile.com/c/bqcjWd/oyCDI) |  |
| PRODIGE 21 | [[95]](https://paperpile.com/c/bqcjWd/Jhx1m) |  |
| REACH | [[96]](https://paperpile.com/c/bqcjWd/j1GU0) | [[97]](https://paperpile.com/c/bqcjWd/WmYdI) |
| REACH-2 | [[98]](https://paperpile.com/c/bqcjWd/9kFok) | [[99]](https://paperpile.com/c/bqcjWd/vQ7Dg) |
| REACHIN | [[100]](https://paperpile.com/c/bqcjWd/8AhUP) | [[101–103]](https://paperpile.com/c/bqcjWd/8Pbyq+66oss+6Ife3) |
| RESORCE | [[104]](https://paperpile.com/c/bqcjWd/27fTV) |  |
| Rimassa 2013 | [[105]](https://paperpile.com/c/bqcjWd/imMhH) | [[106]](https://paperpile.com/c/bqcjWd/INpdf) |
| S-CUBE | [[107]](https://paperpile.com/c/bqcjWd/3KQz3) |  |
| Sanoff 2016 | [[108]](https://paperpile.com/c/bqcjWd/v0xty) |  |
| Santoro 2013 | [[109]](https://paperpile.com/c/bqcjWd/Lun60) |  |
| Sharma 2010 | [[110]](https://paperpile.com/c/bqcjWd/Vwndk) |  |
| SHARP | [[111]](https://paperpile.com/c/bqcjWd/zsimZ) |  |
| Shin 2020 | [[112]](https://paperpile.com/c/bqcjWd/VCqrz) |  |
| Singh 2014 | [[113]](https://paperpile.com/c/bqcjWd/X5pUQ) |  |
| Singh 2016 | [[114]](https://paperpile.com/c/bqcjWd/DhUpM) |  |
| Solimando 2022 | [[115]](https://paperpile.com/c/bqcjWd/UyLry) |  |
| Sonbol 2020 | [[116]](https://paperpile.com/c/bqcjWd/zTlF0) |  |
| Stemmer 2021 | [[117]](https://paperpile.com/c/bqcjWd/ILHKr) |  |
| Takada 1998 | [[118]](https://paperpile.com/c/bqcjWd/k82B4) |  |
| Trevisani 2018 | [[119]](https://paperpile.com/c/bqcjWd/mGJuz) |  |
| Xia 2021 | [[120]](https://paperpile.com/c/bqcjWd/008Ky) |  |
| Yonemoto 2007 | [[121]](https://paperpile.com/c/bqcjWd/wJBF4) |  |
| Zaidi 2021 | [[122]](https://paperpile.com/c/bqcjWd/557d7) | [[123]](https://paperpile.com/c/bqcjWd/UyVeE) |
| Zhang 2012 | [[124]](https://paperpile.com/c/bqcjWd/z7Gmm) |  |
| Zhang 2020 | [[125]](https://paperpile.com/c/bqcjWd/z7Gmm) |  |

1. [Lamarca A, Palmer DH, Wasan HS, Ross PJ, Ma YT, Arora A, et al. Second-line FOLFOX chemotherapy versus active symptom control for advanced biliary tract cancer (ABC-06): a phase 3, open-label, randomised, controlled trial. Lancet Oncol. 2021;22: 690–701.](http://paperpile.com/b/bqcjWd/cAKRN)

2. [Abdel Wahab MM, Ezz Elarab LR, Ezz Elarab MA. Capecitabine plus cisplatin treatment in patients with advanced hepatocellular carcinoma. Chin-Ger J Clin Oncol. 2010;9: 718–723.](http://paperpile.com/b/bqcjWd/n7FjL)

3. [Abdel-Rahman O, Elsayed Z, Elhalawani H. Gemcitabine-based chemotherapy for advanced biliary tract carcinomas. Cochrane Database Syst Rev. 2018;4: CD011746.](http://paperpile.com/b/bqcjWd/dky2c)

4. [Abdelmaksoud AHK, Abdelaziz AO, Nabeel MM, Hamza I, Elbaz TM, Shousha HI, et al. Hepatic arterial infusion chemotherapy in the treatment of advanced hepatocellular carcinoma with portal vein thrombosis: a case-control study. Clin Radiol. 2021;76: 709.e1–709.e6.](http://paperpile.com/b/bqcjWd/7qQlO)

5. [Abou-Alfa GK, Puig O, Daniele B, Kudo M, Merle P, Park J-W, et al. Randomized phase II placebo controlled study of codrituzumab in previously treated patients with advanced hepatocellular carcinoma. J Hepatol. 2016;65: 289–295.](http://paperpile.com/b/bqcjWd/Qvrgf)

6. [Yen C-J, Daniele B, Kudo M, Merle P, Park J-W, Ross PJ, et al. Randomized phase II trial of intravenous RO5137382/GC33 at 1600 mg every other week and placebo in previously treated patients with unresectable advanced hepatocellular carcinoma (HCC; NCT01507168). J Clin Oncol. 2014;32: 4102–4102.](http://paperpile.com/b/bqcjWd/VzQDp)

7. [Abou-Alfa GK, Qin S, Ryoo B-Y, Lu S-N, Yen C-J, Feng Y-H, et al. Phase III randomized study of second line ADI-PEG 20 plus best supportive care versus placebo plus best supportive care in patients with advanced hepatocellular carcinoma. Ann Oncol. 2018;29: 1402–1408.](http://paperpile.com/b/bqcjWd/J3vPw)

8. [Qin S, Li Q, Gu S, Chen X, Lin L, Wang Z, et al. Apatinib as second-line or later therapy in patients with advanced hepatocellular carcinoma (AHELP): a multicentre, double-blind, randomised, placebo-controlled, phase 3 trial. Lancet Gastroenterol Hepatol. 2021;6: 559–568.](http://paperpile.com/b/bqcjWd/RZbOi)

9. [Li Q, Qin S, Gu S, Chen X, Lin L, Wang Z, et al. Apatinib as second-line therapy in Chinese patients with advanced hepatocellular carcinoma: A randomized, placebo-controlled, double-blind, phase III study. J Clin Oncol. 2020;38: 4507–4507.](http://paperpile.com/b/bqcjWd/pgyaj)

10. [Cheng A-L, Kang Y-K, Chen Z, Tsao C-J, Qin S, Kim JS, et al. Efficacy and safety of sorafenib in patients in the Asia-Pacific region with advanced hepatocellular carcinoma: a phase III randomised, double-blind, placebo-controlled trial. Lancet Oncol. 2009;10: 25–34.](http://paperpile.com/b/bqcjWd/Lhbwn)

11. [Yang T, Qin S, Tak W, Yu S, Tsao C, Kim J, et al. Impact of prior surgical resection with curative intent on the efficacy and safety of sorafenib in patients with advanced hepatocellular carcinoma (HCC): Subset analysis of the Asia-Pacific (AP) study. J Clin Oncol. 2009;27: e15518–e15518.](http://paperpile.com/b/bqcjWd/EaJzp)

12. [Tak WY, Yu S, Tsao CJ, Yang TS, Kim JS, Qin S, et al. 823 impact of prior tace/Tae on the efficacy and safety of sorafenib in patients with advanced hepatocellular carcinoma (hcc) from the Asia-pacific region. J Hepatol. 2009;50: S301.](http://paperpile.com/b/bqcjWd/Pq8et)

13. [Pan H, Guan Z, Kang YK, Chen Z, Tsao CJ, Cheng AL, et al. 807 impact of lung and lymph node metastasis on efficacy and safety following treatment with sorafenib in patients with hepatocellular carcinoma from the Asia-pacific region. J Hepatol. 2009;50: S295.](http://paperpile.com/b/bqcjWd/OD1Ml)

14. [Qin S, Yang T, Tak W, Yu S, Tsao C, Kim J, et al. Efficacy and safety of sorafenib in patients with advanced hepatocellular carcinoma (HCC): Asia-Pacific (AP) trial subgroup analyses by baseline transaminase (ALT/AST)/α-fetoprotein (AFP) levels. J Clin Oncol. 2009;27: 4590–4590.](http://paperpile.com/b/bqcjWd/FHs3X)

15. [Cheng A-L, Guan Z, Chen Z, Tsao C-J, Qin S, Kim JS, et al. Efficacy and safety of sorafenib in patients with advanced hepatocellular carcinoma according to baseline status: subset analyses of the phase III Sorafenib Asia-Pacific trial. Eur J Cancer. 2012;48: 1452–1465.](http://paperpile.com/b/bqcjWd/i0yMe)

16. [Cheng A, Kang Y, Chen Z, Tsao C, Qin S, Kim J, et al. Randomized phase III trial of sorafenib versus placebo in Asian patients with advanced hepatocellular carcinoma. J Clin Oncol. 2008;26: 4509–4509.](http://paperpile.com/b/bqcjWd/hkLt3)

17. [Azarfane M, Lièvre A, Senellart H, Dessomme B, Guillouche P, Meyer J, et al. Predictive Factors of Chemotherapy Initiation after Biliary Drainage for Advanced Biliary Tract Cancer: A Retrospective Multicenter Study. J Gastrointestin Liver Dis. 2021;30: 254–258.](http://paperpile.com/b/bqcjWd/5wA75)

18. [Daniele B, Di Maio M, Gallo C, Gasbarrini A, Carteni G, Di Costanzo GG, et al. A randomized phase III trial comparing sorafenib plus best supportive care (BSC) versus BSC alone in Child-Pugh B patients (pts) with advanced hepatocellular carcinoma (HCC): The BOOST study. J Clin Oncol. 2012;30: TPS4151–TPS4151.](http://paperpile.com/b/bqcjWd/6WmtU)

19. [Llovet JM, Decaens T, Raoul J-L, Boucher E, Kudo M, Chang C, et al. Brivanib in patients with advanced hepatocellular carcinoma who were intolerant to sorafenib or for whom sorafenib failed: results from the randomized phase III BRISK-PS study. J Clin Oncol. 2013;31: 3509–3516.](http://paperpile.com/b/bqcjWd/DVCFd)

20. [Brunner TB, Schwab D, Meyer T, Sauer R. Chemoradiation may prolong survival of patients with non-bulky unresectable extrahepatic biliary carcinoma. A retrospective analysis. Strahlenther Onkol. 2004;180: 751–757.](http://paperpile.com/b/bqcjWd/3wufK)

21. [Abou-Alfa GK, Meyer T, Cheng A-L, El-Khoueiry AB, Rimassa L, Ryoo B-Y, et al. Cabozantinib in Patients with Advanced and Progressing Hepatocellular Carcinoma. N Engl J Med. 2018;379: 54–63.](http://paperpile.com/b/bqcjWd/p2eVa)

22. [Kelley RK, Miksad R, Cicin I, Chen Y, Klümpen H-J, Kim S, et al. Efficacy and safety of cabozantinib for patients with advanced hepatocellular carcinoma based on albumin-bilirubin grade. Br J Cancer. 2022;126: 569–575.](http://paperpile.com/b/bqcjWd/HOEuE)

23. [Kelley RK, Ryoo B-Y, Merle P, Park J-W, Bolondi L, Chan SL, et al. Second-line cabozantinib after sorafenib treatment for advanced hepatocellular carcinoma: a subgroup analysis of the phase 3 CELESTIAL trial. ESMO Open. 2020;5. doi:](http://paperpile.com/b/bqcjWd/lmN1S)[10.1136/esmoopen-2020-000714](http://dx.doi.org/10.1136/esmoopen-2020-000714)

24. [Nguyen L, Chapel S, Tran BD, Lacy S. Cabozantinib exposure-response analyses of efficacy and safety in patients with advanced hepatocellular carcinoma. J Pharmacokinet Pharmacodyn. 2019;46: 577–589.](http://paperpile.com/b/bqcjWd/Cfk86)

25. [Abou-Alfa GK, Meyer T, Cheng A-L, Cicin I, Bolondi L, Klümpen HJ, et al. Association of adverse events (AEs) with efficacy outcomes for cabozantinib (C) in patients (pts) with advanced hepatocellular carcinoma (aHCC) in the phase III CELESTIAL trial. J Clin Oncol. 2019;37: 4088–4088.](http://paperpile.com/b/bqcjWd/twXbZ)

26. [Miksad R, Cicin I, Chen Y, Klumpen H, Kim S, Lin Z, et al. Outcomes based on Albumin-Bilirubin (ALBI) grade in the phase 3 CELESTIAL trial of cabozantinib versus placebo in patients with advanced hepatocellular carcinoma (HCC). Ann Oncol. 2019;30 Suppl 4: iv134.](http://paperpile.com/b/bqcjWd/f5SIp)

27. [Abou-Alfa GK, Mollon P, Meyer T, Cheng A-L, El-Khoueiry AB, Kelley RK, et al. Quality-adjusted life years assessment using cabozantinib for patients with advanced hepatocellular carcinoma (aHCC) in the CELESTIAL trial. J Clin Oncol. 2019;37: 207–207.](http://paperpile.com/b/bqcjWd/two3w)

28. [Blanc JF, Meyer T, Cheng A-L, El-Khoueiry AB, Cicin I, Chen Y, et al. Assessment of disease burden in the phase III CELESTIAL trial of cabozantinib (C) versus placebo (P) in advanced hepatocellular carcinoma (HCC). Ann Oncol. 2018;29 Suppl 8: viii237.](http://paperpile.com/b/bqcjWd/XgdHT)

29. [Yau T, Cheng A-L, Meyer T, Ryoo B-Y, Park J-W, Klümpen H-J, et al. Outcomes by prior transarterial chemoembolization (TACE) in the phase III CELESTIAL trial of cabozantinib (C) versus placebo (P) in patients (pts) with advanced hepatocellular carcinoma (HCC). Ann Oncol. 2018;29 Suppl 8: viii237–viii238.](http://paperpile.com/b/bqcjWd/quK0X)

30. [Rimassa L, Kelley RK, Meyer T, Ryoo B-Y, Merle P, Park J-W, et al. Outcomes based on plasma biomarkers for the phase III CELESTIAL trial of cabozantinib (C) versus placebo (P) in advanced hepatocellular carcinoma (aHCC). Ann Oncol. 2019;30: v257–v258.](http://paperpile.com/b/bqcjWd/fI5Yc)

31. [Rimassa L, Cicin I, Blanc J-F, Klümpen HJ, Zagonel V, Tran A, et al. Outcomes based on age in the phase 3 CELESTIAL trial of cabozantinib (C) versus placebo (P) in patients (pts) with advanced hepatocellular carcinoma (HCC). J Clin Oncol. 2018;36: 4090–4090.](http://paperpile.com/b/bqcjWd/YE09g)

32. [Kelley RK, Ryoo B-Y, Merle P, Park J-W, Bolondi L, Chan SL, et al. Outcomes in patients (pts) who had received sorafenib (S) as the only prior systemic therapy in the phase 3 CELESTIAL trial of cabozantinib (C) versus placebo (P) in advanced hepatocellular carcinoma (HCC). J Clin Oncol. 2018;36: 4088–4088.](http://paperpile.com/b/bqcjWd/qNOXh)

33. [Abou-Alfa GK, Meyer T, Cheng A-L, El-Khoueiry AB, Rimassa L, Ryoo B-Y, et al. Cabozantinib (C) versus placebo (P) in patients (pts) with advanced hepatocellular carcinoma (HCC) who have received prior sorafenib: Results from the randomized phase III CELESTIAL trial. J Clin Oncol. 2018;36: 207–207.](http://paperpile.com/b/bqcjWd/LGfqm)

34. [Kelley RK, El-Khoueiry AB, Meyer T, Rimassa L, Merle P, Chan SL, et al. Outcomes by baseline alpha-fetoprotein (AFP) levels in the phase III CELESTIAL trial of cabozantinib (C) versus placebo (P) in previously treated advanced hepatocellular carcinoma (HCC). Ann Oncol. 2018;29 Suppl 8: viii236.](http://paperpile.com/b/bqcjWd/nNBla)

35. [Kelley RK, Meyer T, Rimassa L, Merle P, Park J-W, Yau T, et al. Serum Alpha-fetoprotein Levels and Clinical Outcomes in the Phase III CELESTIAL Study of Cabozantinib versus Placebo in Patients with Advanced Hepatocellular Carcinoma. Clin Cancer Res. 2020;26: 4795–4804.](http://paperpile.com/b/bqcjWd/0SrRU)

36. [Yau T, Meyer T, Kelley RK, Mangeshkar M, Cheng A-L, El-Khoueiry AB, et al. Prognostic and predictive factors from the phase III CELESTIAL trial of cabozantinib (C) versus placebo (P) in previously treated advanced hepatocellular carcinoma (aHCC). Ann Oncol. 2019;30: ix48.](http://paperpile.com/b/bqcjWd/mUsJv)

37. [El-Khoueiry A, Meyer T, Cheng A, Rimassa L, Sen S, Milwee S, et al. SO-9 Outcomes for patients with advanced hepatocellular carcinoma and Child-Pugh B liver function in the phase 3 CELESTIAL study of cabozantinib vs placebo. Ann Oncol. 2020;31: S220.](http://paperpile.com/b/bqcjWd/fUbwM)

38. [Chen J, Wang J, Xie F. Comparative efficacy and safety for second-line treatment with ramucirumab, regorafenib, and cabozantinib in patients with advanced hepatocellular carcinoma progressed on sorafenib treatment: A network meta-analysis. Medicine . 2021;100: e27013.](http://paperpile.com/b/bqcjWd/tm87H)

39. [Chen C-T, Feng Y-H, Yen C-J, Chen S-C, Lin Y-T, Lu L-C, et al. Prognosis and treatment pattern of advanced hepatocellular carcinoma after failure of first-line atezolizumab and bevacizumab treatment. Hepatol Int. 2022;16: 1199–1207.](http://paperpile.com/b/bqcjWd/LztV6)

40. [Abou-Alfa GK, Macarulla T, Javle MM, Kelley RK, Lubner SJ, Adeva J, et al. Ivosidenib in IDH1-mutant, chemotherapy-refractory cholangiocarcinoma (ClarIDHy): a multicentre, randomised, double-blind, placebo-controlled, phase 3 study. Lancet Oncol. 2020;21: 796–807.](http://paperpile.com/b/bqcjWd/uS8uC)

41. [Zhu AX, Macarulla T, Javle MM, Kelley RK, Lubner SJ, Adeva J, et al. Final Overall Survival Efficacy Results of Ivosidenib for Patients With Advanced Cholangiocarcinoma With IDH1 Mutation: The Phase 3 Randomized Clinical ClarIDHy Trial. JAMA Oncol. 2021;7: 1669–1677.](http://paperpile.com/b/bqcjWd/edU6c)

42. [Dierks J, Gaspersz MP, Belkouz A, van Vugt JLA, Coelen RJS, de Groot JWB, et al. Translating the ABC-02 trial into daily practice: outcome of palliative treatment in patients with unresectable biliary tract cancer treated with gemcitabine and cisplatin. Acta Oncol. 2018;57: 807–812.](http://paperpile.com/b/bqcjWd/1HryB)

43. [Ding W, Tan Y, Qian Y, Xue W, Wang Y, Jiang P, et al. First-line targ veted therapies of advanced hepatocellular carcinoma: A Bayesian network analysis of randomized controlled trials. PLoS One. 2020;15: e0229492.](http://paperpile.com/b/bqcjWd/4naXh)

44. [Dover LL, McDonald AM, Derek DA, Wang TN, Oster RA, Jacob R. Impact of definitive chemoradiation therapy on survival in patients with unresectable cholangiocarcinoma. Int J Radiat Oncol Biol Phys. 2014;90: S204.](http://paperpile.com/b/bqcjWd/OJYvb)

45. [Du Y-A, Yu P, Huang L, Dai G, Cai X. The comparative safety and efficacy of S-1 versus the best supportive care in advanced hepatocellular carcinoma. Int J Clin Exp Med. 2019 [cited 26 Apr 2023]. Available:](http://paperpile.com/b/bqcjWd/IM7T8) <https://www.semanticscholar.org/paper/The-comparative-safety-and-efficacy-of-S-1-versus-Du-Yu/117dd3f5d9b8a89850c141b33e17685d9604b939>

46. [ChiCTR-IIR-17014202. In: ICTRP Search Portal [Internet]. [cited 26 Apr 2023]. Available:](http://paperpile.com/b/bqcjWd/OEDP9) <https://trialsearch.who.int/Trial2.aspx?TrialID=ChiCTR-IIR-17014202>

47. [El Baghdady N, Elwakeel L, Ellithy M, Hussein N, Shahin S, El Naggar AR. Efficacy and safety of sorafenib versus supportive care in Egyptian advanced hepatocellular carcinoma patients. Archives of Pharmaceutical Sciences Ain Shams University. 2020;4: 224–236.](http://paperpile.com/b/bqcjWd/0JOIP)

48. [El Baghdady NSED, El Wakeel L, Ellithy MA, Eltohamy N, Shaheen SM, El Naggar AER. Assessment of efficacy and safety of sorafenib versus no treatment in Egyptian hepatocellular carcinoma patients. Ann Oncol. 2019;30: ix64.](http://paperpile.com/b/bqcjWd/SVj42)

49. [EudraCT 2007-007629-32. In: EU Clinical Trials Register [Internet]. Available:](http://paperpile.com/b/bqcjWd/eMmKB) <https://www.clinicaltrialsregister.eu/ctr-search/trial/2007-007629-32/results>

50. [Zhu AX, Kudo M, Assenat E, Cattan S, Kang Y-K, Lim HY, et al. Effect of everolimus on survival in advanced hepatocellular carcinoma after failure of sorafenib: the EVOLVE-1 randomized clinical trial. JAMA. 2014;312: 57–67.](http://paperpile.com/b/bqcjWd/7v5DW)

51. [Faruque LI, Lin M, Battistella M, Wiebe N, Reiman T, Hemmelgarn B, et al. Systematic review of the risk of adverse outcomes associated with vascular endothelial growth factor inhibitors for the treatment of cancer. PLoS One. 2014;9: e101145.](http://paperpile.com/b/bqcjWd/6Z4Tt)

52. [Finn RS, Zhu AX, Farah W, Almasri J, Zaiem F, Prokop LJ, et al. Therapies for advanced stage hepatocellular carcinoma with macrovascular invasion or metastatic disease: A systematic review and meta-analysis. Hepatology. 2018;67: 422–435.](http://paperpile.com/b/bqcjWd/gTxeQ)

53. [Ghiassi-Nejad Z, Moshier E, Schwartz M, Buckstein M. Definitive chemoradiation therapy in the treatment of unresectable intrahepatic cholangiocarcinoma: A national cancer data base study. Int J Radiat Oncol Biol Phys. 2016;96: E211–E212.](http://paperpile.com/b/bqcjWd/r2PpJ)

54. [Glimelius B, Hoffman K, Sjödén PO, Jacobsson G, Sellström H, Enander LK, et al. Chemotherapy improves survival and quality of life in advanced pancreatic and biliary cancer. Ann Oncol. 1996;7: 593–600.](http://paperpile.com/b/bqcjWd/ZLhWo)

55. [Griffiths CD, Zhang B, Tywonek K, Meyers BM, Serrano PE. Toxicity Profiles of Systemic Therapies for Advanced Hepatocellular Carcinoma: A Systematic Review and Meta-analysis. JAMA Netw Open. 2022;5: e2222721.](http://paperpile.com/b/bqcjWd/DoOw5)

56. [Guo T, Liu P, Yang J, Wu P, Chen B, Liu Z, et al. Evaluation of Targeted Agents for Advanced and Unresectable Hepatocellular Carcinoma: A Network Meta-Analysis. J Cancer. 2019;10: 4671–4678.](http://paperpile.com/b/bqcjWd/xhPEe)

57. [Haber PK, Puigvehí M, Castet F, Lourdusamy V, Montal R, Tabrizian P, et al. Evidence-Based Management of Hepatocellular Carcinoma: Systematic Review and Meta-analysis of Randomized Controlled Trials (2002-2020). Gastroenterology. 2021;161: 879–898.](http://paperpile.com/b/bqcjWd/QvPUX)

58. [Hiramine Y, Tamai T, Imamura Y, Baba Y, Hiwaki T, Yamashita H, et al. Efficacy and optimal treatment sequence of Sorafenib and hepatic arterial infusion chemotherapy for advanced hepatocellular carcinoma. Kanzo. 2013;54: 233–248.](http://paperpile.com/b/bqcjWd/BodCW)

59. [Hiraoka A, Kumada T, Hatanaka T, Tada T, Kariyama K, Tani J, et al. Therapeutic efficacy of lenvatinib as third-line treatment after regorafenib for unresectable hepatocellular carcinoma progression. Hepatol Res. 2021;51: 880–889.](http://paperpile.com/b/bqcjWd/jazaE)

60. [Hsiao P, Hsieh K-C, Chen Y-S, Hsu C-C, Lo G-H, Li Y-C, et al. Sorafenib with concurrent multiple-line therapies improves overall survival in advanced stage hepatocellular carcinoma. Medicine . 2019;98: e16074.](http://paperpile.com/b/bqcjWd/jx4C8)

61. [Hsu C, Yang T-S, Huo T-I, Hsieh R-K, Yu C-W, Hwang W-S, et al. Vandetanib in patients with inoperable hepatocellular carcinoma: a phase II, randomized, double-blind, placebo-controlled study. J Hepatol. 2012;56: 1097–1103.](http://paperpile.com/b/bqcjWd/XgtXI)

62. [Hsu C, Yang TS, Huo TL, Hsieh RK, Hwang WS, Hsieh TY, et al. 6518 Evaluation of vandetanib in patients with inoperable hepatocellular carcinoma (HCC): a randomized, double-blind, parallel group, multicentre, Phase II study. EJC Suppl. 2009;7: 367.](http://paperpile.com/b/bqcjWd/LMb4O)

63. [Huang Y, Cheng X, Sun P, Li T, Song Z, Zheng Q. Supplementary Sorafenib Therapies for Hepatocellular Carcinoma-A Systematic Review and Meta-Analysis: Supplementary Sorafenib for Liver Cancer. J Clin Gastroenterol. 2019;53: 486–494.](http://paperpile.com/b/bqcjWd/Jts8w)

64. [Ishii H, Furuse J, Yonemoto N, Nagase M, Yoshino M, Sato T. Chemotherapy in the treatment of advanced gallbladder cancer. Oncology. 2004;66: 138–142.](http://paperpile.com/b/bqcjWd/3I0ps)

65. [Ishikawa T, Ichida T, Sugitani S, Tsuboi Y, Genda T, Sugahara S, et al. Improved survival with oral administration of enteric-coated tegafur/uracil for advanced stage IV-A hepatocellular carcinoma. J Gastroenterol Hepatol. 2001;16: 452–459.](http://paperpile.com/b/bqcjWd/E46Xv)

66. [Jácome AA, Castro ACG, Vasconcelos JPS, Silva MHCR, Lessa MAO, Moraes ED, et al. Efficacy and Safety Associated With Immune Checkpoint Inhibitors in Unresectable Hepatocellular Carcinoma: A Meta-analysis. JAMA Netw Open. 2021;4: e2136128.](http://paperpile.com/b/bqcjWd/jyMc4)

67. [Jang JW, Bae SH, Choi JY, Oh HJ, Kim MS, Lee SY, et al. A combination therapy with transarterial chemo-lipiodolization and systemic chemo-infusion for large extensive hepatocellular carcinoma invading portal vein in comparison with conservative management. Cancer Chemother Pharmacol. 2007;59: 9–15.](http://paperpile.com/b/bqcjWd/tM9jG)

68. [Kudo M, Morimoto M, Moriguchi M, Izumi N, Takayama T, Yoshiji H, et al. A randomized, double-blind, placebo-controlled, phase 3 study of tivantinib in Japanese patients with MET-high hepatocellular carcinoma. Cancer Sci. 2020;111: 3759–3769.](http://paperpile.com/b/bqcjWd/fbsuo)

69. [Ji Y-X, Zhang Z-F, Lan K-T, Nie K-K, Geng C-X, Liu S-C, et al. Sorafenib in liver function impaired advanced hepatocellular carcinoma. Chin Med Sci J. 2014;29: 7–14.](http://paperpile.com/b/bqcjWd/v7kgE)

70. [Ji JH, Kim YS, Park I, Lee SI, Kim RB, Park JO, et al. Chemotherapy versus Best Supportive Care in Advanced Biliary Tract Carcinoma: A Multi-institutional Propensity Score Matching Analysis. Cancer Res Treat. 2018;50: 791–800.](http://paperpile.com/b/bqcjWd/tJ8kJ)

71. [Jiang Y, Zeng Z, Zeng J, Liu C, Qiu J, Li Y, et al. Efficacy and Safety of First-Line Chemotherapies for Patients With Advanced Biliary Tract Carcinoma: A Systematic Review and Network Meta-Analysis. Front Oncol. 2021;11: 736113.](http://paperpile.com/b/bqcjWd/TGRhK)

72. [Kane RC, Farrell AT, Madabushi R, Booth B, Chattopadhyay S, Sridhara R, et al. Sorafenib for the treatment of unresectable hepatocellular carcinoma. Oncologist. 2009;14: 95–100.](http://paperpile.com/b/bqcjWd/6Z5fY)

73. [Kang Y-K, Yau T, Park J-W, Lim HY, Lee T-Y, Obi S, et al. Randomized phase II study of axitinib versus placebo plus best supportive care in second-line treatment of advanced hepatocellular carcinoma. Ann Oncol. 2015;26: 2457–2463.](http://paperpile.com/b/bqcjWd/fUext)

74. [Kang SH, Cho H, Cho EJ, Lee J-H, Yu SJ, Kim YJ, et al. Efficacy of Sorafenib for the Treatment of Post-Transplant Hepatocellular Carcinoma Recurrence. J Korean Med Sci. 2018;33: e283.](http://paperpile.com/b/bqcjWd/7abf1)

75. [Finn RS, Ryoo B-Y, Merle P, Kudo M, Bouattour M, Lim HY, et al. Pembrolizumab As Second-Line Therapy in Patients With Advanced Hepatocellular Carcinoma in KEYNOTE-240: A Randomized, Double-Blind, Phase III Trial. J Clin Oncol. 2020;38: 193–202.](http://paperpile.com/b/bqcjWd/OarOJ)

76. [Kudo M, Lim HY, Cheng A-L, Chao Y, Yau T, Ogasawara S, et al. Pembrolizumab as Second-Line Therapy for Advanced Hepatocellular Carcinoma: A Subgroup Analysis of Asian Patients in the Phase 3 KEYNOTE-240 Trial. Liver Cancer. 2021;10: 275–284.](http://paperpile.com/b/bqcjWd/WX8v)

77. [Ryoo B-Y, Merle P, Kulkarni AS, Cheng A-L, Bouattour M, Lim HY, et al. Health-related quality-of-life impact of pembrolizumab versus best supportive care in previously systemically treated patients with advanced hepatocellular carcinoma: KEYNOTE-240. Cancer. 2021;127: 865–874.](http://paperpile.com/b/bqcjWd/kntF)

78. [Vogel A, Merle P, Verslype C, Finn RS, Zhu AX, Cheng A-L, et al. ALBI score and outcomes in patients with hepatocellular carcinoma: analysis of the randomized controlled trial KEYNOTE-240. Ther Adv Med Oncol. 2021;13: 17588359211039928.](http://paperpile.com/b/bqcjWd/VA4X)

79. [Kataria B, Sharma A, Mishra S, Bhatnagar S, Thulkar S, Yadav M, et al. Capecitabine +best supportive care (BSC) or erlotinib +BSC has overall survival (OS) benefit over BSC alone in unresectable/metastatic gall bladder cancer (GBC) patients with ECOG PS-III. Results from a phase II randomised controlled trial (RCT). Ann Oncol. 2019;30: v279.](http://paperpile.com/b/bqcjWd/BxDy)

80. [Kataria B, Sharma A, Pramanik R, Sahoo R, Thulkar S, Yadav M, et al. PD-9 Three-arm phase II/III randomized controlled trial in patients with unresectable/metastatic gall bladder cancer with poor performance status: Erlotinib or capecitabine v/s best supportive care. Ann Oncol. 2022;33: S242.](http://paperpile.com/b/bqcjWd/F54s)

81. [Koch C, Franzke C, Bechstein WO, Schnitzbauer AA, Filmann N, Vogl T, et al. Poor Prognosis of Advanced Cholangiocarcinoma: Real-World Data from a Tertiary Referral Center. Digestion. 2020;101: 458–465.](http://paperpile.com/b/bqcjWd/rcYKc)

82. [Lai CL, Wu PC, Chan GC, Lok AS, Lin HJ. Doxorubicin versus no antitumor therapy in inoperable hepatocellular carcinoma. A prospective randomized trial. Cancer. 1988;62: 479–483.](http://paperpile.com/b/bqcjWd/GqVIN)

83. [Lesmana LA, Gani RA, Hasan I, Waspodo A, Boedi P, Luwia MS, et al. Influence of the sorafenib patients assistance program on treatment compliance and overall survival of unresectable hepatocellular carcinoma patients. Acta Med Indones. 2012;44: 228–232.](http://paperpile.com/b/bqcjWd/FkAT8)

84. [Ling-lin Z, Li M, Jin-hui T, Ke-hu Y. Sorafenib for advanced hepatocellular carcinoma: a systematic review. Zhongguo Yi Xue Ke Xue Yuan Xue Bao. 2011;33: 51–57.](http://paperpile.com/b/bqcjWd/YtJT7)

85. [Liu W, Quan B, Lu S, Tang B, Li M, Chen R, et al. First-Line Systemic Treatment Strategies for Unresectable Hepatocellular Carcinoma: A Systematic Review and Network Meta-Analysis of Randomized Clinical Trials. Front Oncol. 2021;11: 771045.](http://paperpile.com/b/bqcjWd/B3O0E)

86. [Mao W, Deng F, Wang D, Gao L, Shi X. Treatment of advanced gallbladder cancer: A SEER-based study. Cancer Med. 2020;9: 141–150.](http://paperpile.com/b/bqcjWd/sJVXZ)

87. [Rimassa L, Assenat E, Peck-Radosavljevic M, Pracht M, Zagonel V, Mathurin P, et al. Tivantinib for second-line treatment of MET-high, advanced hepatocellular carcinoma (METIV-HCC): a final analysis of a phase 3, randomised, placebo-controlled study. Lancet Oncol. 2018;19: 682–693.](http://paperpile.com/b/bqcjWd/0qmAt)

88. [Meyers BM, Knox JJ, Cosby R, Beecroft JR, Chan KK, Coburn N, et al. Non-surgical management of advanced hepatocellular carcinoma: A systematic review by Cancer Care Ontario. Can Liver J. 2021;4: 257–274.](http://paperpile.com/b/bqcjWd/LUdfq)

89. [Min Jae K, Hwang J-H, Lee J-C, Shin DW, Yang SY. Impact on gemcitabine plus cisplatin in unresectable hilar cholangiocarcinoma patients according to effective bile drainage. Ann Oncol. 2018;29 Suppl 9: ix50.](http://paperpile.com/b/bqcjWd/D5nkm)

90. [Moik F, Riedl JM, Winder T, Terbuch A, Rossmann CH, Szkandera J, et al. Benefit of second-line systemic chemotherapy for advanced biliary tract cancer: A propensity score analysis. Sci Rep. 2019;9: 5548.](http://paperpile.com/b/bqcjWd/MrtS9)

91. [Sorafenib in Liver Function Impaired Advanced Hepatocellular Carcinoma. [cited 27 Apr 2023]. Available:](http://paperpile.com/b/bqcjWd/xSO4c) <https://clinicaltrials.gov/ct2/show/NCT01932385>

92. [Niu M, Hong D, Ma T-C, Chen X-W, Han J-H, Sun J, et al. Short-term and long-term efficacy of 7 targeted therapies for the treatment of advanced hepatocellular carcinoma: a network meta-analysis: Efficacy of 7 targeted therapies for AHCC. Medicine . 2016;95: e5591.](http://paperpile.com/b/bqcjWd/PicOx)

93. [Park DH, Lee SS, Park SE, Lee JL, Choi JH, Choi HJ, et al. Randomised phase II trial of photodynamic therapy plus oral fluoropyrimidine, S-1, versus photodynamic therapy alone for unresectable hilar cholangiocarcinoma. Eur J Cancer. 2014;50: 1259–1268.](http://paperpile.com/b/bqcjWd/f84Ba)

94. [Park R, Lopes da Silva L, Nissaisorakarn V, Riano I, Williamson S, Sun W, et al. Comparison of Efficacy of Systemic Therapies in Advanced Hepatocellular Carcinoma: Updated Systematic Review and Frequentist Network Meta-Analysis of Randomized Controlled Trials. J Hepatocell Carcinoma. 2021;8: 145–154.](http://paperpile.com/b/bqcjWd/oyCDI)

95. [Blanc J-F, Khemissa F, Bronowicki J-P, Monterymard C, Perarnau J-M, Bourgeois V, et al. Phase 2 trial comparing sorafenib, pravastatin, their combination or supportive care in HCC with Child-Pugh B cirrhosis. Hepatol Int. 2021;15: 93–104.](http://paperpile.com/b/bqcjWd/Jhx1m)

96. [Zhu AX, Park JO, Ryoo B-Y, Yen C-J, Poon R, Pastorelli D, et al. Ramucirumab versus placebo as second-line treatment in patients with advanced hepatocellular carcinoma following first-line therapy with sorafenib (REACH): a randomised, double-blind, multicentre, phase 3 trial. Lancet Oncol. 2015;16: 859–870.](http://paperpile.com/b/bqcjWd/j1GU0)

97. [Zhu AX, Chau I, Blanc J-F, Okusaka T, Rojas M, Yang L, et al. A multicenter, randomized, double-blind, phase III study of ramucirumab (IMC-1121B; RAM) and best supportive care (BSC) versus placebo (PBO) and BSC as second-line treatment in patients (pts) with hepatocellular carcinoma (HCC) following first-line therapy with sorafenib (SOR). J Clin Oncol. 2012;30: TPS4146–TPS4146.](http://paperpile.com/b/bqcjWd/WmYdI)

98. [Zhu AX, Kang Y-K, Yen C-J, Finn RS, Galle PR, Llovet JM, et al. Ramucirumab after sorafenib in patients with advanced hepatocellular carcinoma and increased α-fetoprotein concentrations (REACH-2): a randomised, double-blind, placebo-controlled, phase 3 trial. Lancet Oncol. 2019;20: 282–296.](http://paperpile.com/b/bqcjWd/9kFok)

99. [Kudo M, Okusaka T, Motomura K, Ohno I, Morimoto M, Seo S, et al. Ramucirumab after prior sorafenib in patients with advanced hepatocellular carcinoma and elevated alpha-fetoprotein: Japanese subgroup analysis of the REACH-2 trial. J Gastroenterol. 2020;55: 627–639.](http://paperpile.com/b/bqcjWd/vQ7Dg)

100. [Demols A, Borbath I, Van den Eynde M, Houbiers G, Peeters M, Marechal R, et al. Regorafenib after failure of gemcitabine and platinum-based chemotherapy for locally advanced/metastatic biliary tumors: REACHIN, a randomized, double-blind, phase II trial. Ann Oncol. 2020;31: 1169–1177.](http://paperpile.com/b/bqcjWd/8AhUP)

101. [Demols A, Borbath I, Van den Eynde M, Houbiers G, Peeters M, Marechal R, et al. Exploratory analysis based on tumor location of REACHIN, a randomized, double-blinded, placebo-controlled phase 2 trial of regorafenib after failure of gemcitabine and platinum-based chemotherapy for advanced/metastatic biliary tract tumors. Ann Oncol. 2019;30 Suppl 4: iv127.](http://paperpile.com/b/bqcjWd/8Pbyq)

102. [Demols A, Borbath I, Van Den Eynde M, Houbiers G, Peeters M, Maréchal R, et al. An exploratory analysis based on tumor location of REACHIN, a randomized double-blinded placebo-controlled phase II trial of regorafenib after failure of gemcitabine and platinum-based chemotherapy for locally advanced (nonresectable) and metastatic biliary tract tumors. J Clin Oncol. 2019;37: e15622–e15622.](http://paperpile.com/b/bqcjWd/66oss)

103. [Demols A, Borbath I, Van Den Eynde M, Houbiers G, Peeters M, Maréchal R, et al. Regorafenib after failure of gemcitabine and platinum-based chemotherapy for locally advanced (nonresectable) and metastatic biliary tumors: A randomized double-blinded placebo-controlled phase II trial. J Clin Oncol. 2019;37: 345–345.](http://paperpile.com/b/bqcjWd/6Ife3)

104. [Bruix J, Qin S, Merle P, Granito A, Huang Y-H, Bodoky G, et al. Regorafenib for patients with hepatocellular carcinoma who progressed on sorafenib treatment (RESORCE): a randomised, double-blind, placebo-controlled, phase 3 trial. Lancet. 2017;389: 56–66.](http://paperpile.com/b/bqcjWd/27fTV)

105. [Rimassa L, Pressiani T, Boni C, Carnaghi C, Rota Caremoli E, Fagiuoli S, et al. A phase II randomized dose escalation trial of sorafenib in patients with advanced hepatocellular carcinoma. Oncologist. 2013;18: 379–380.](http://paperpile.com/b/bqcjWd/imMhH)

106. [Pressiani T, Rimassa L, Boni C, Labianca R, Fagiuoli S, Ardizzoni A, et al. Phase II randomized trial on dose-escalated sorafenib (S) versus best supportive care (BSC) in patients with advanced hepatocellular carcinoma (HCC) with disease progression on prior S treatment. J Clin Oncol. 2011;29: 4115–4115.](http://paperpile.com/b/bqcjWd/INpdf)

107. [Kudo M, Moriguchi M, Numata K, Hidaka H, Tanaka H, Ikeda M, et al. S-1 versus placebo in patients with sorafenib-refractory advanced hepatocellular carcinoma (S-CUBE): a randomised, double-blind, multicentre, phase 3 trial. Lancet Gastroenterol Hepatol. 2017;2: 407–417.](http://paperpile.com/b/bqcjWd/3KQz3)

108. [Sanoff HK, Chang Y, Lund JL, O’Neil BH, Dusetzina SB. Sorafenib Effectiveness in Advanced Hepatocellular Carcinoma. Oncologist. 2016;21: 1113–1120.](http://paperpile.com/b/bqcjWd/v0xty)

109. [Santoro A, Rimassa L, Borbath I, Daniele B, Salvagni S, Van Laethem JL, et al. Tivantinib for second-line treatment of advanced hepatocellular carcinoma: a randomised, placebo-controlled phase 2 study. Lancet Oncol. 2013;14: 55–63.](http://paperpile.com/b/bqcjWd/Lun60)

110. [Sharma A, Dwary AD, Mohanti BK, Deo SV, Pal S, Sreenivas V, et al. Best supportive care compared with chemotherapy for unresectable gall bladder cancer: a randomized controlled study. J Clin Oncol. 2010;28: 4581–4586.](http://paperpile.com/b/bqcjWd/Vwndk)

111. [Llovet JM, Ricci S, Mazzaferro V, Hilgard P, Gane E, Blanc J-F, et al. Sorafenib in advanced hepatocellular carcinoma. N Engl J Med. 2008;359: 378–390.](http://paperpile.com/b/bqcjWd/zsimZ)

112. [Shin DW, Kim MJ, Lee J-C, Kim J, Woo SM, Lee WJ, et al. Gemcitabine Plus Cisplatin Chemotherapy Prolongs the Survival in Advanced Hilar Cholangiocarcinoma: A Large Multicenter Study. Am J Clin Oncol. 2020;43: 422–427.](http://paperpile.com/b/bqcjWd/VCqrz)

113. [Singh P, Sharma S, Kapoor R, Kumar R, Bahl A, Kumar N, et al. Best supportive care compared with chemotherapy and radiotherapy for unresectable gallbladder cancer: A tertiary care institute experience. Clin Cancer Investig J. 2014;3: 153.](http://paperpile.com/b/bqcjWd/X5pUQ)

114. [Singh SK, Talwar R, Kannan N, Tyagi AK, Jaiswal P, Kumar A. Chemotherapy Compared with Best Supportive Care for Metastatic/Unresectable Gallbladder Cancer: a Non-randomized Prospective Cohort Study. Indian J Surg Oncol. 2016;7: 25–31.](http://paperpile.com/b/bqcjWd/DhUpM)

115. [Solimando AG, Susca N, Argentiero A, Brunetti O, Leone P, De Re V, et al. Second-line treatments for Advanced Hepatocellular Carcinoma: A Systematic Review and Bayesian Network Meta-analysis. Clin Exp Med. 2022;22: 65–74.](http://paperpile.com/b/bqcjWd/UyLry)

116. [Sonbol MB, Riaz IB, Naqvi SAA, Almquist DR, Mina S, Almasri J, et al. Systemic Therapy and Sequencing Options in Advanced Hepatocellular Carcinoma: A Systematic Review and Network Meta-analysis. JAMA Oncol. 2020;6: e204930.](http://paperpile.com/b/bqcjWd/zTlF0)

117. [Stemmer SM, Manojlovic NS, Marinca MV, Petrov P, Cherciu N, Ganea D, et al. Namodenoson in Advanced Hepatocellular Carcinoma and Child-Pugh B Cirrhosis: Randomized Placebo-Controlled Clinical Trial. Cancers . 2021;13. doi:](http://paperpile.com/b/bqcjWd/ILHKr)[10.3390/cancers13020187](http://dx.doi.org/10.3390/cancers13020187)

118. [Takada T, Nimura Y, Katoh H, Nagakawa T, Nakayama T, Matsushiro T, et al. Prospective randomized trial of 5-fluorouracil, doxorubicin, and mitomycin C for non-resectable pancreatic and biliary carcinoma: multicenter randomized trial. Hepatogastroenterology. 1998;45: 2020–2026.](http://paperpile.com/b/bqcjWd/k82B4)

119. [Trevisani F, Brandi G, Garuti F, Barbera MA, Tortora R, Casadei Gardini A, et al. Metronomic capecitabine as second-line treatment for hepatocellular carcinoma after sorafenib discontinuation. J Cancer Res Clin Oncol. 2018;144: 403–414.](http://paperpile.com/b/bqcjWd/mGJuz)

120. [Xia J, Gelfond J, Arora SP. Second-line treatment with nivolumab, cabozantinib, regorafenib, or best supportive care in patients with advanced hepatocellular carcinoma: analysis at a Hispanic-majority NCI-designated cancer center. J Gastrointest Oncol. 2021;12: 2943–2951.](http://paperpile.com/b/bqcjWd/008Ky)

121. [Yonemoto N, Furuse J, Okusaka T, Yamao K, Funakoshi A, Ohkawa S, et al. A multi-center retrospective analysis of survival benefits of chemotherapy for unresectable biliary tract cancer. Jpn J Clin Oncol. 2007;37: 843–851.](http://paperpile.com/b/bqcjWd/wJBF4)

122. [Zaidi A, Chandna N, Narasimhan G, Moser M, Haider K, Chalchal H, et al. Second-line Chemotherapy Prolongs Survival in Real World Patients With Advanced Biliary Tract and Gallbladder Cancers: A Multicenter Retrospective Population-based Cohort Study. Am J Clin Oncol. 2021;44: 93–98.](http://paperpile.com/b/bqcjWd/557d7)

123. Zaidi A, Chandna N, Narasimhan G, Moser M, Haider K, Chalchal HI, et al. Second-line chemotherapy (SLC) in patients with advanced biliary tract and gallbladder cancers (ABGC) prolongs survival: A retrospective population-based cohort study. Ann Oncol. 2019;30: v282. doi:10.1093/annonc/mdz247.062

124. Zhang X, Yang X-R, Huang X-W, Wang W-M, Shi R-Y, Xu Y, et al. Sorafenib in treatment of patients with advanced hepatocellular carcinoma: a systematic review. Hepatobiliary Pancreat Dis Int. 2012;11: 458–466. doi:10.1016/s1499-3872(12)60209-4

125. Zhang Y, Huang G, Miao H, Song Z, Zhang X, Fan W, et al. Apatinib treatment may improve survival outcomes of patients with hepatitis B virus-related sorafenib-resistant hepatocellular carcinoma. Ther Adv Med Oncol. 2020;12: 1758835920937422. doi:10.1177/1758835920937422
